# Supplementary material for: Naltrexone Implant for the Treatment of Polydrug Dependence: A Randomized Controlled Trial
Source: Atypon-hosted journal article supplement (doi:10.1176/appi.ajp.2011.11071121), 2012-02-17

**FIGURE S1.** CONSORT flow chart for the study. “Lost to follow-up” refers to participants who dropped out without any notice, and “declined to participate” refers to patients who indicated that they wanted to stop participating the study.

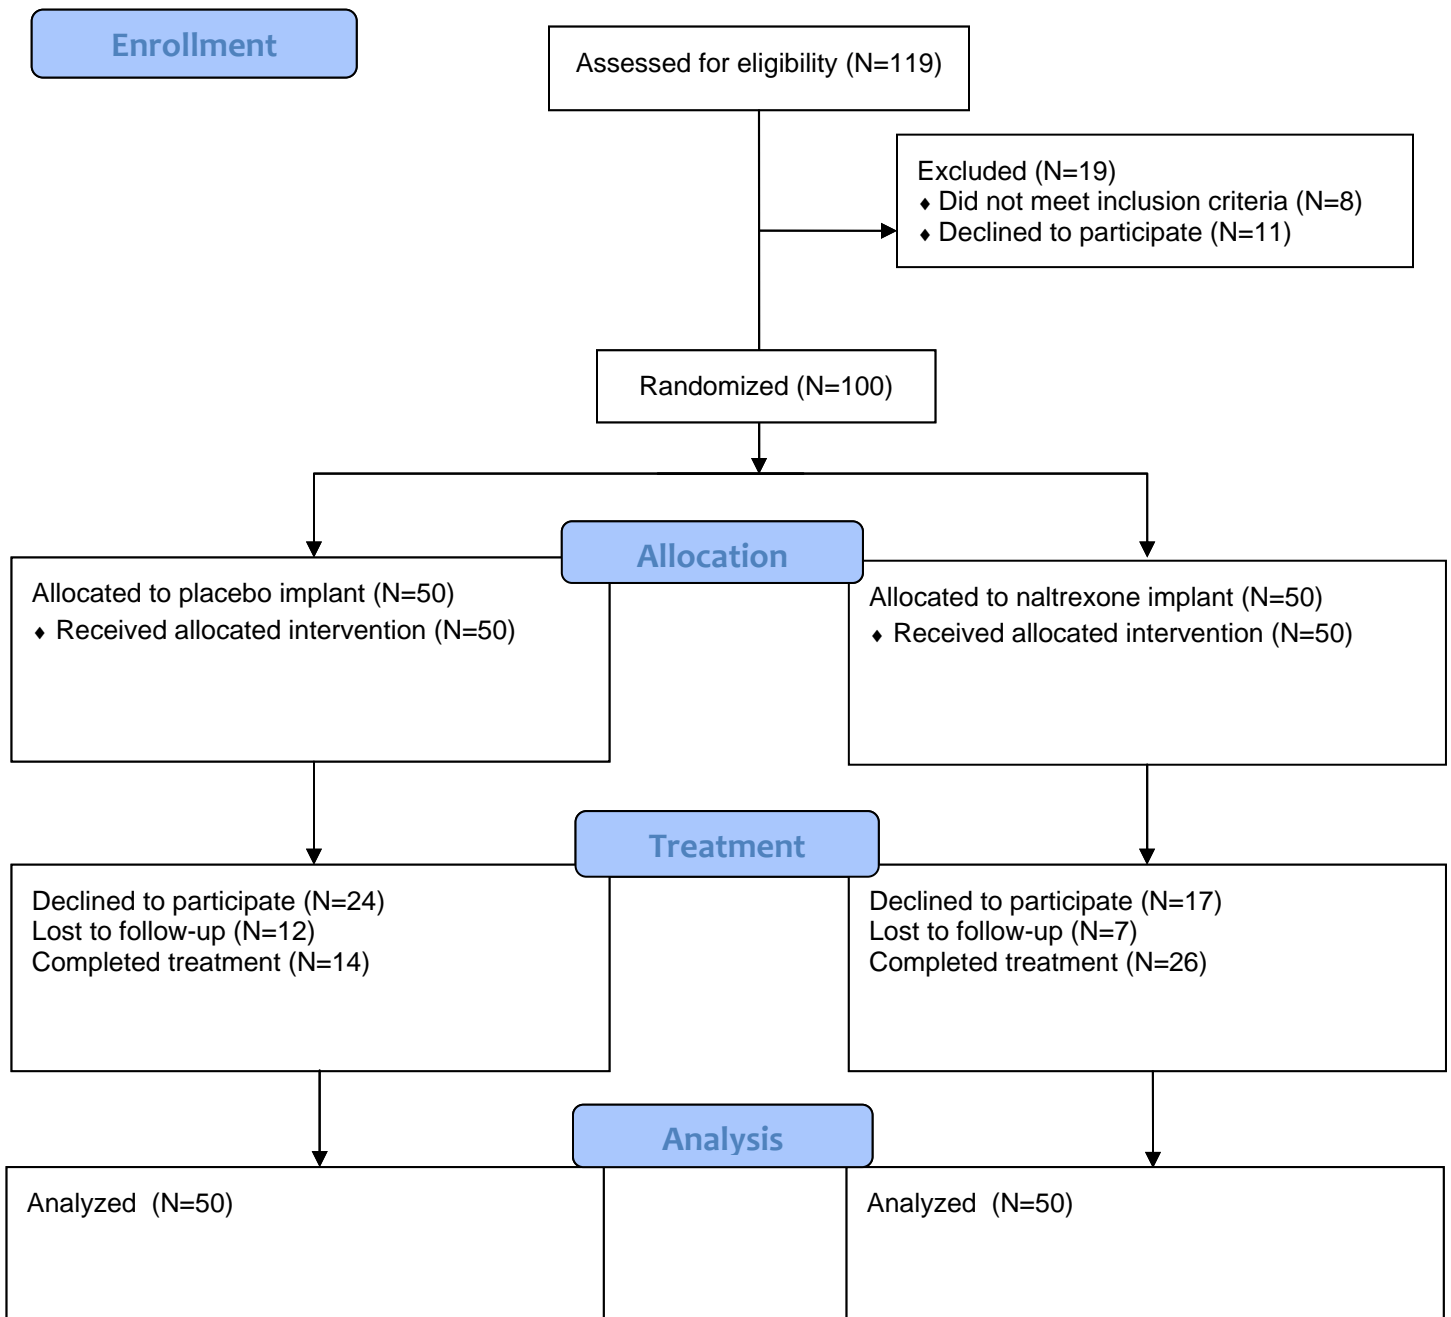

Supplement: appi.ajp.2011.11071121.ds001.pdf [file appi.ajp.2011.11071121.ds001.pdf]
